# Supplementary material for: A typology of caregiving spouses of geriatric patients without dementia: caring, worried, desperate
Source: Springer Nature journal article supplement (doi:10.1186/s12877-021-02425-1), 2021-09-06
Supplement: MOESM1 [file 19636482]

# A Typology of caregiving spouses of geriatric patients without dementia: Caring, Worried, Desperate

## Interview guide

| Suggested questions/interview topics                                                                                                                                                                                                                                                                                                                                                                                                                                                                                                                                                                                                                                                                                                                                                                                                                                                                                                                                                                                                                                                                                                                                                                                                    | Additional Prompts                                                                                                                                                                                                                                                             |
|-----------------------------------------------------------------------------------------------------------------------------------------------------------------------------------------------------------------------------------------------------------------------------------------------------------------------------------------------------------------------------------------------------------------------------------------------------------------------------------------------------------------------------------------------------------------------------------------------------------------------------------------------------------------------------------------------------------------------------------------------------------------------------------------------------------------------------------------------------------------------------------------------------------------------------------------------------------------------------------------------------------------------------------------------------------------------------------------------------------------------------------------------------------------------------------------------------------------------------------------|--------------------------------------------------------------------------------------------------------------------------------------------------------------------------------------------------------------------------------------------------------------------------------|
| <p><b>Introduction</b></p> <ul style="list-style-type: none"> <li>• Acknowledgement for time and participation</li> <li>• Information about aim of the research project</li> <li>• Information and consent to the recording</li> <li>• Assurance of anonymity</li> </ul>                                                                                                                                                                                                                                                                                                                                                                                                                                                                                                                                                                                                                                                                                                                                                                                                                                                                                                                                                                |                                                                                                                                                                                                                                                                                |
| <p><b>Interview</b></p> <ul style="list-style-type: none"> <li>• I`d like you to tell me about yourself. Tell me about the most important stages in your life.</li> <li>• I am particularly interested in caregiving spouses. Can you tell me about a typical day with your wife/husband, for example about yesterday? Start with getting up in the morning.</li> <li>• How did it come about that you have taken over the care of your partner?</li> <li>• How would it be if someone else took over the care? Would a nursing home be an alternative?</li> <li>• The Media often talks about the burden of caring for relatives - how is it for you?"</li> <li>• I have also read about positive experiences and aspects of taking over care. What are your experiences in this regard?</li> <li>• You told me about your daily routine and what you do for your wife/husband. Many caregivers in your situation would like support - so how about you?</li> <li>• People who have demanding or stressful experiences often have a very individual approach to dealing with them. They have developed their own strategies - how about you?</li> <li>• What are your thoughts about you and your wife's/husband's future?"</li> </ul> | <p>Can you elaborate on this...</p> <p>How do you feel...</p> <p>Can you give me an example ...</p> <p>Can you describe it to me in detail?</p> <p>What happened...</p> <p>What did you think/feel...</p> <p>What does it mean to you...</p> <p>What triggers this in you?</p> |
| <p><b>Debriefing</b></p> <ul style="list-style-type: none"> <li>• Is there anything else you would like to share with me regarding your situation?</li> <li>• Closing words</li> </ul>                                                                                                                                                                                                                                                                                                                                                                                                                                                                                                                                                                                                                                                                                                                                                                                                                                                                                                                                                                                                                                                  |                                                                                                                                                                                                                                                                                |
